# Supplementary material for: PER-CRISPR/Cas14a system-based electrochemical biosensor for the detection of ctDNA EGFR L858R
Source: Royal Society of Chemistry journal article supplement (doi:10.1039/d3ay01615c), 2023-12-07
Supplement: d3ay01615c1.pdf [file d3ay01615c1.pdf]

Table S1. The sequences used in the reaction of PER and CRISPR/Cas14a

| Name                    | Sequence (5'-3')                                                                                                                                                 |
|-------------------------|------------------------------------------------------------------------------------------------------------------------------------------------------------------|
| EGFR L858R              | GATTTTGGGCGGGCCAAACTG                                                                                                                                            |
| the hairpin H1          | AATAAGAGATCAGTTTGGCCCGCCCAAATCATCTCTTATT                                                                                                                         |
| the hairpin H2          | ATCTCTTATTGGGCCTTTTGGCCCAATAAGAGATAATAAGAGAT                                                                                                                     |
| the cleaner<br>sequence | CCCCGAAAGTGGCCTCGGGCCTTTTGGCCCGAGGCCACTTTCG                                                                                                                      |
| FAM-ssDNA-BHQ           | FAM-TTATTTTATT-BHQ                                                                                                                                               |
| activator               | ATCTCTTATT                                                                                                                                                       |
| tracrRNA                | CUUCACUGAUAAAGUGGAGAACCGCUUCACCAAAGCUGUCC<br>CUUAGGGGAUUAGAACUUGAGUGAAGGUGGGCUGCUUGCAUC<br>AGCCUAAUGUCGAGAAGUGCUUUCUUCGAAAGUAACCCUCG<br>AAACAAAUUCAUUUGGAAUGCAAC |
| crRNA                   | GAAUGAAGGAAUGCAACUAAUAAGAGAU                                                                                                                                     |
| ssDNA-MB                | SH-(CH <sub>2</sub> ) <sub>6</sub> -TTTTTTTTTTTTTTTTTTTT-MB                                                                                                      |

**Table S2.** The sequences of mismatch DNA

| <b>name</b>                     | <b>Sequence (5'-3')</b>                   |
|---------------------------------|-------------------------------------------|
| ctDNA EGFR wild                 | GAT TTT GGG CTG GCC AAA CTG               |
| Single-base-mismatched DNA (SB) | GAT TTT GGG CGG GCC <b>AGA</b> CTG        |
| Double-base-mismatched DNA (DB) | GAT TTT <b>TGG</b> CGG GCC <b>AGA</b> CTG |
| Three-base-mismatched DNA (TB)  | GAT TTT <b>TGG CTG</b> GCC <b>AGA</b> CTG |
| Non-complementary DNA (NC)      | AGCGCGATAATATAAGCGACA                     |

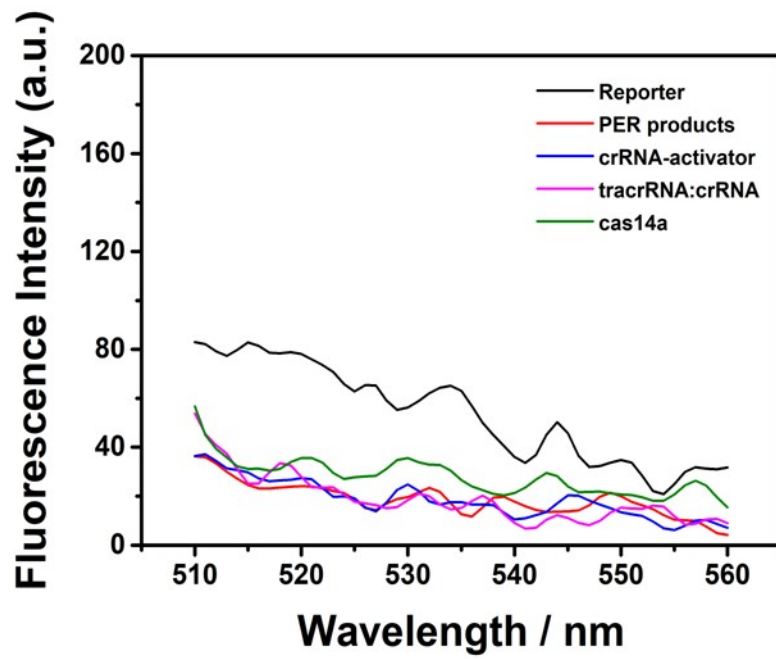

**Figure S1.** Fluorescence spectra of the reporter, the PER products, the crRNA-activator, the tracrRNA: crRNA and the cas14a.
